# Supplementary material
Source: PubMed Central journal article supplement (PMC2651085)
Supplement: NIHMS74414-supplement-01.pdf [file NIHMS74414-supplement-01.pdf]

## **Supplementary Information**

### **Engineered Extracellular Matrices with Cleavable Crosslinkers for Cell Expansion and Easy Cell Recovery**

Jianxing Zhang, Aleksander Skardal<sup>#</sup>, and Glenn D. Prestwich<sup>#,\*</sup>

Center for Therapeutic Biomaterials, <sup>#</sup>Department of Bioengineering, and Department of  
Medicinal Chemistry, The University of Utah, 419 Wakara Way Suite 205, Salt Lake City, UT

84108-1257

**Supplementary Figure 1. Swelling ratios of hydrogels and sponges.** sECM hydrogels formed using the triblock, pentablock, and heptablock PEG(SS)<sub>n</sub>DA crosslinkers were allowed to swell in PBS at pH = 7.4. Swelling ratio is defined as the mass of the swollen hydrogel to the mass of the dried hydrogel.

**Supplementary Figure 2. Redissolution times of hydrogels with L-cysteine or L-glutathione.** Stirred solutions of 1 mL of Cys or 1 mL of GSH at concentrations varying from 10 mM to 100 mM were used to dissolve the sECM hydrogels formed using the triblock, pentablock, and heptablock PEG(SS)<sub>n</sub>DA crosslinkers. Dissolution time was defined as the time from the addition of Cys or GSH to the time at which there was no remaining hydrogel that could be visually detected.

**Supplementary Figure 3. Cell viability for “3-D on top” culture for three cell types.** MTS absorbance readings at Day 3 and Day 7, proportional to live cell density, are shown. Panel A, NIH3T3 fibroblasts; Panel B, HepG2 C3A cells; Panel C, hMSCs were cultured on the surface of HA hydrogels or sponges (sp) made with differing crosslinker types. One asterisk (\*) indicates statistical difference relative to plastic control ( $p < 0.01$ ) and two asterisks (\*\*) indicate statistical difference relative to PEGDA control (gel for gel group, sponge for sponge group).

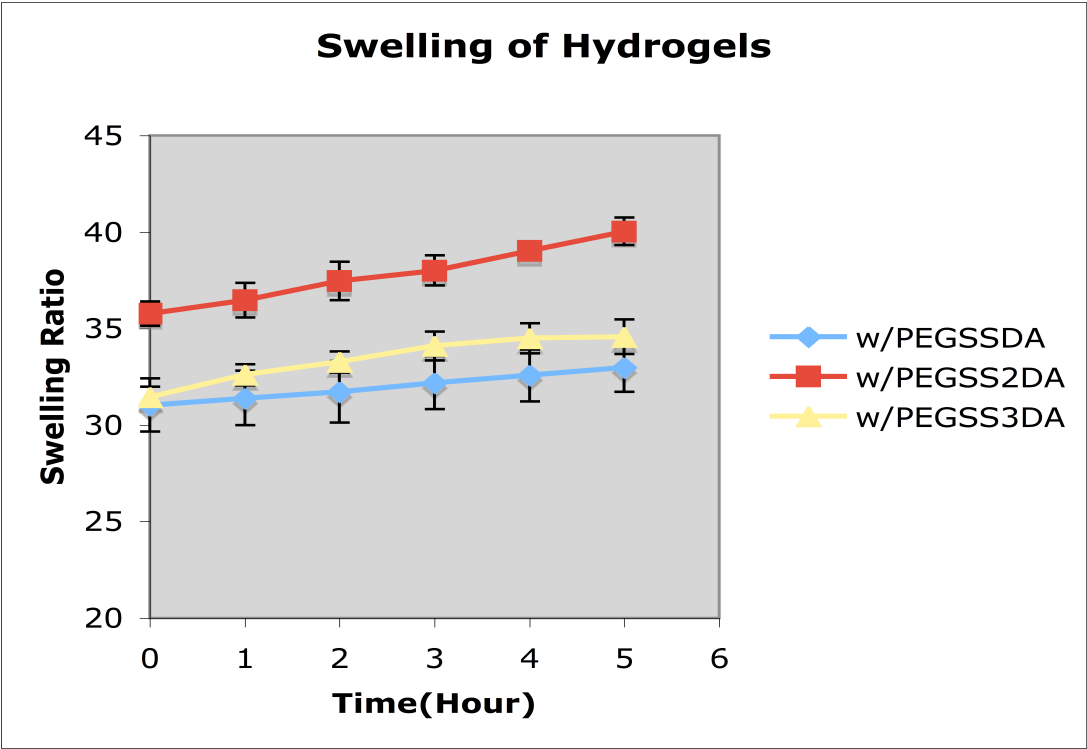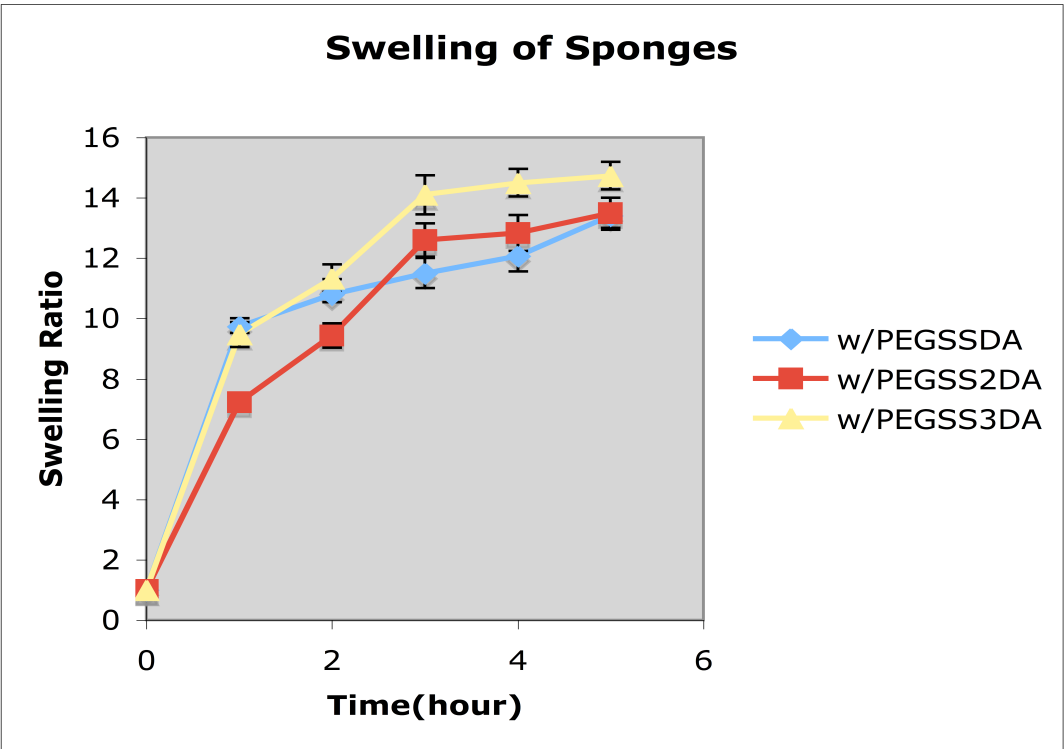

Supplementary Figure 1

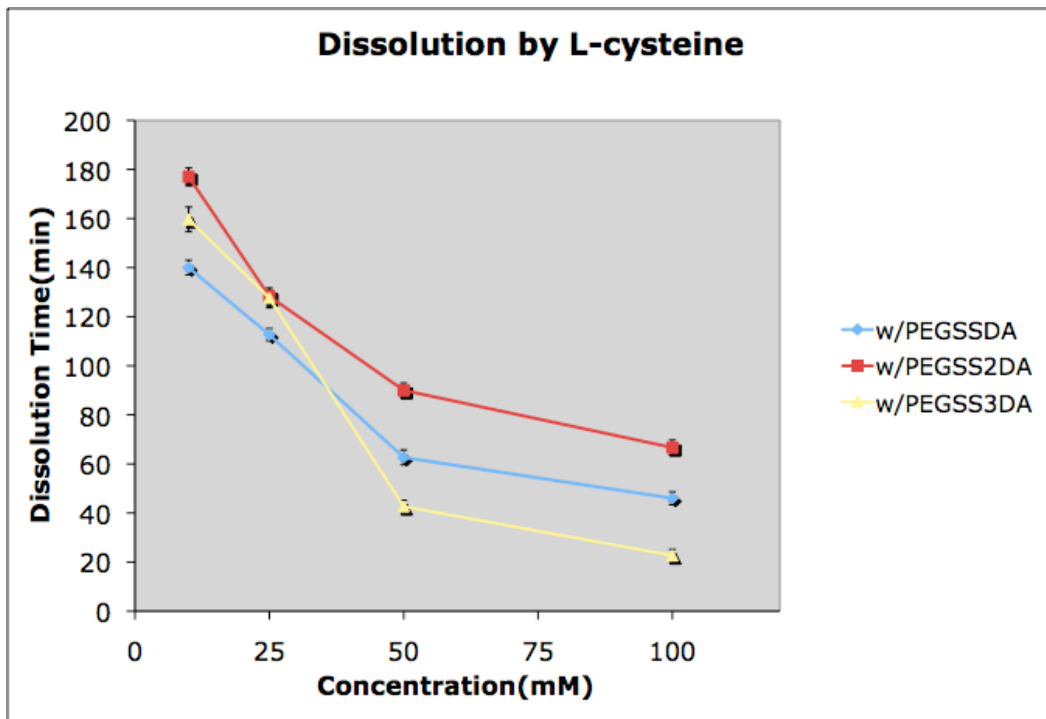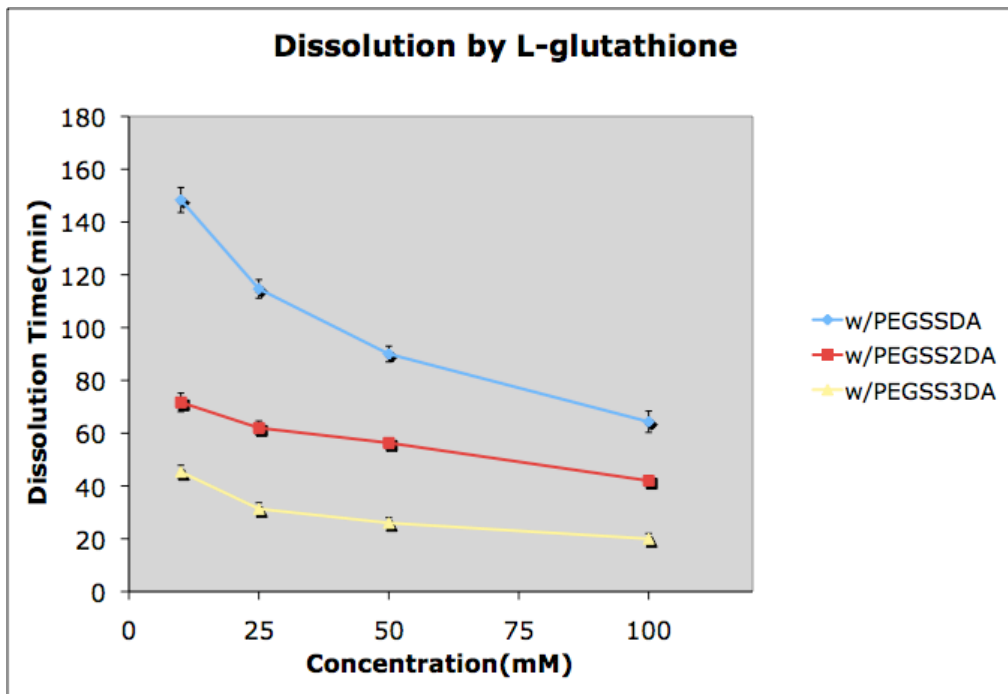

Supplementary Figure 2

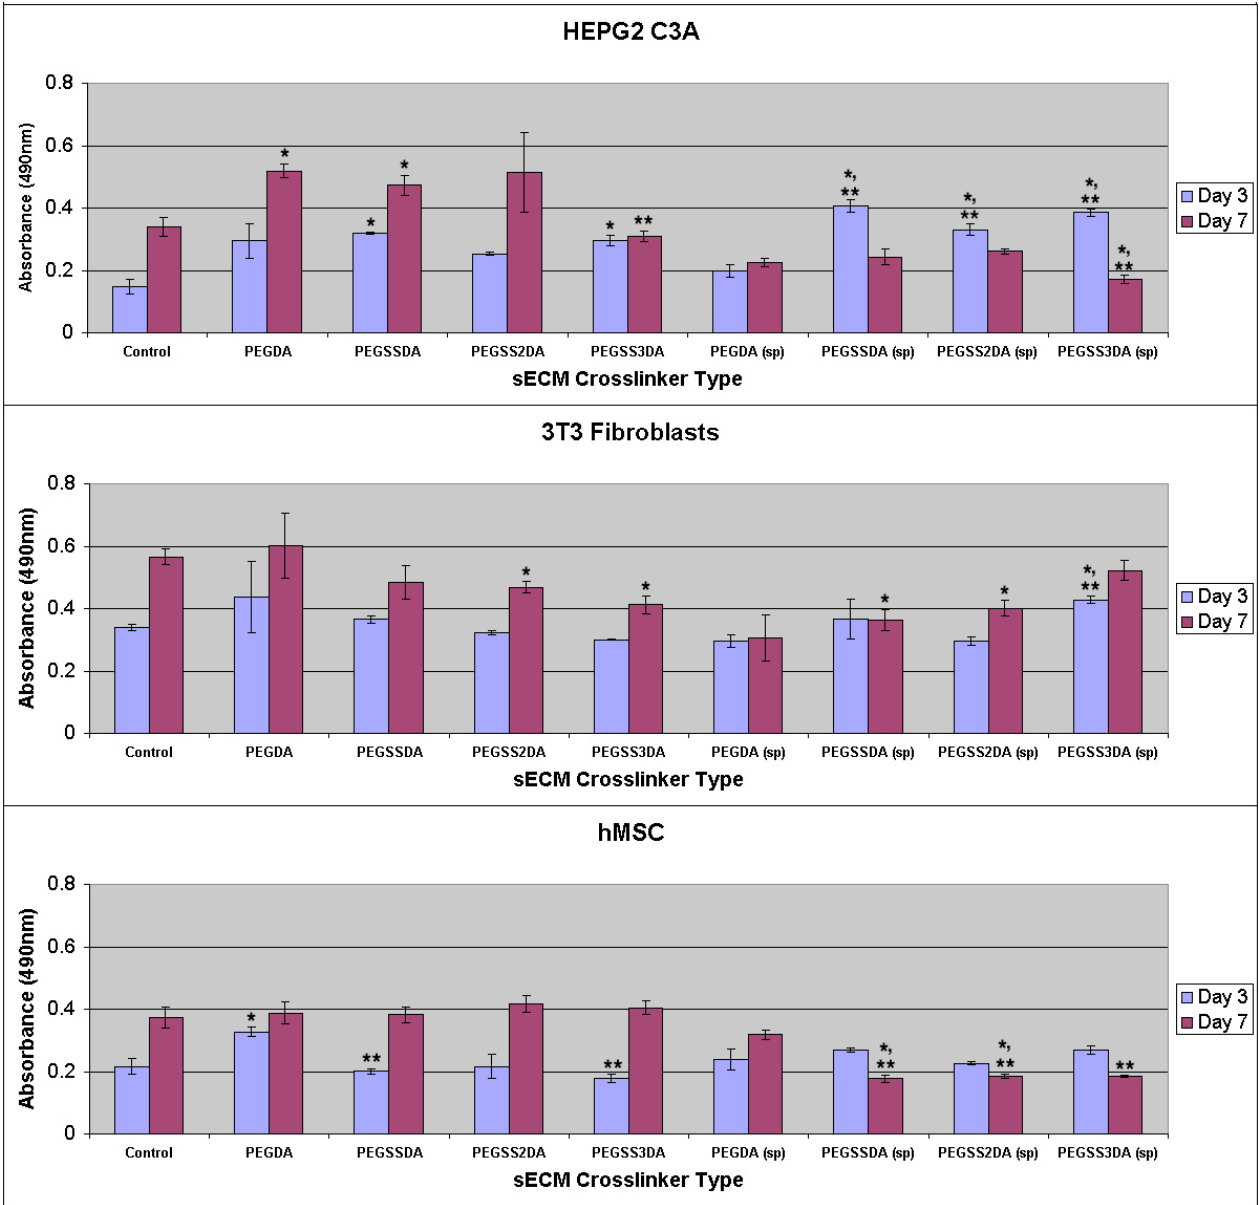

Supplementary Figure 3
